# Supplementary material for: Real-Time Respiration Changes as a Viability Indicator for Rapid Antibiotic Susceptibility Testing in a Microfluidic Chamber Array
Source: PubMed Central journal article supplement — ACS Sens. 2021 Apr 26;6(6):2202–10. doi: 10.1021/acssensors.1c00020 (PMC8240088; doi:10.1021/acssensors.1c00020), 2021-04-26
Supplement: se1c00020_si_001.pdf [file se1c00020_si_001.pdf]

## Supporting information

### **Real-time respiration changes as a viability indicator for rapid antibiotic susceptibility testing in a microfluidic chamber array**

Petra Jusková<sup>‡</sup>, Steven Schmitt<sup>§</sup>, André Kling<sup>‡</sup>, Darius G. Rackus<sup>‡</sup>, Martin Held<sup>§</sup>, Adrian Egli<sup>¥</sup> and Petra S. Dittrich<sup>\*‡</sup>

<sup>‡</sup>Department of Biosystems Science and Engineering, Bioanalytics Group, ETH Zürich, Mattenstrasse 26, 4058 Basel, Switzerland

<sup>§</sup>Department of Biosystems Science and Engineering, Bioprocess Laboratory, ETH Zürich, Mattenstrasse 26, 4058 Basel, Switzerland

<sup>¥</sup> Clinical Bacteriology and Mycology, University Hospital Basel, Petersgraben 4, 4031 Basel, Switzerland

\*Corresponding author: Prof. Dr. Petra Dittrich, E-mail: [petra.dittrich@bsse.ethz.ch](mailto:petra.dittrich@bsse.ethz.ch)

## Supporting figures

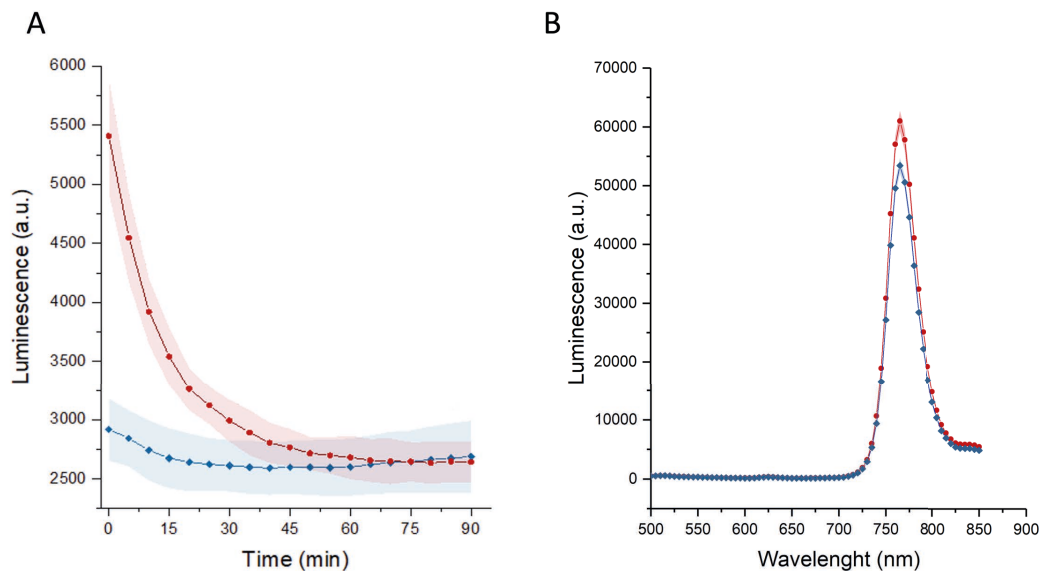

**Figure S1.** Comparison between two DI water samples with different dissolved oxygen levels containing oxygen-sensing nanoprobe at a concentration identical to the AST measurements ( $83 \mu\text{g mL}^{-1}$ ).

A: Time-resolved changes of the luminescence of the oxygen-sensing nanoprobe measured on the 96 well-plate ( $n=8$  for each sample) using an automated microscope.

The water sample saturated with nitrogen (red) shows a higher luminescence level compared against the sample without the pre-treatment (blue). All the chambers were open during the measurement; therefore, the oxygen level (luminescence) changed with time and in about two hours reached the same level in all of the observed chambers. Error bars represent the standard deviations.

B: Emission spectra (excitation 438 nm) of the water sample saturated with nitrogen (red) compared to the emission spectrum of the sample without the pre-treatment (blue). The sample saturated with the nitrogen reaches a greater luminescence level.  $n=3$  for each condition. Error bars represent the standard deviations.

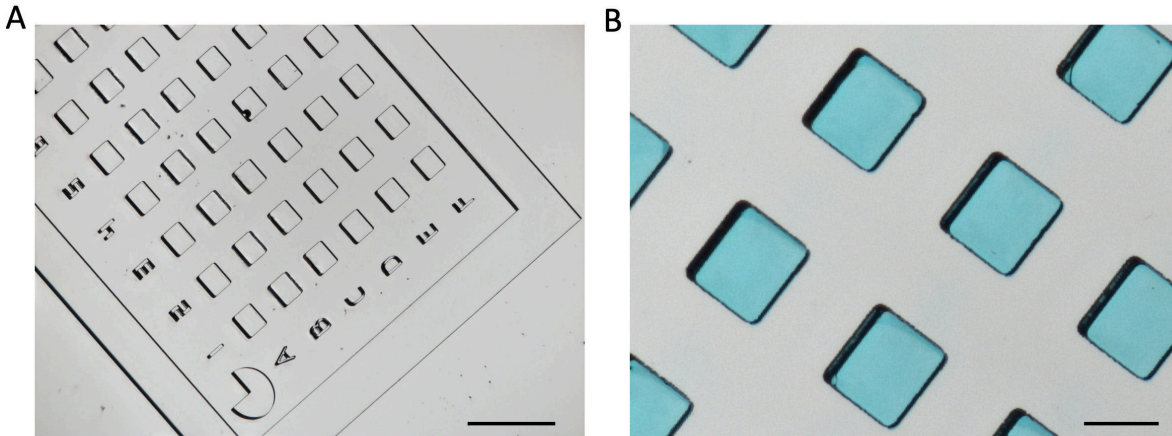

**Figure S2.** Microfluidic platform prepared in COC by thermal imprinting.

A: Detail figure of the one of the four arrays. Each row and column is marked with letters and numbers, respectively. Each of the four arrays also contains a symbol in the corner (here, 3/4 of the circle) allowing us to easily recognize each array (ATB concentration) during microscopy. B: Detail of the COC array filled with agarose gel containing blue food colorant for better visualization. Scale bars: 1 mm, 250  $\mu\text{m}$  respectively.

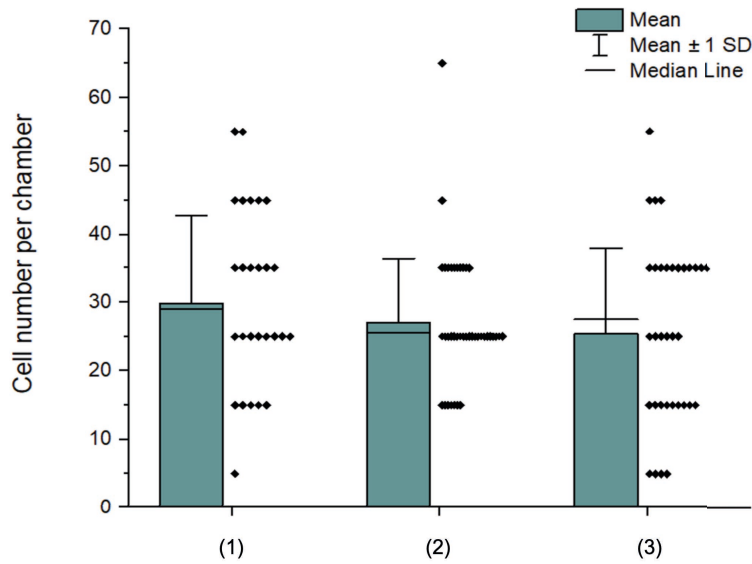

**Figure S3.** The cell number per chamber for three independent experiments without exposure to antibiotics. First column: number of analyzed chambers,  $n=27$ ; mean cells/chamber=30, second column:  $n=40$ ; mean cells/chamber=27, third column:  $n=34$ ; mean cells/chamber=25. The data demonstrate that the number of cells per chamber is between 5-65 cells, with the mean about 27 cells per chamber. However, it is important to mention that the measurements of the cell number using the FIJI software do not take into account overlapping cells or cell clusters.

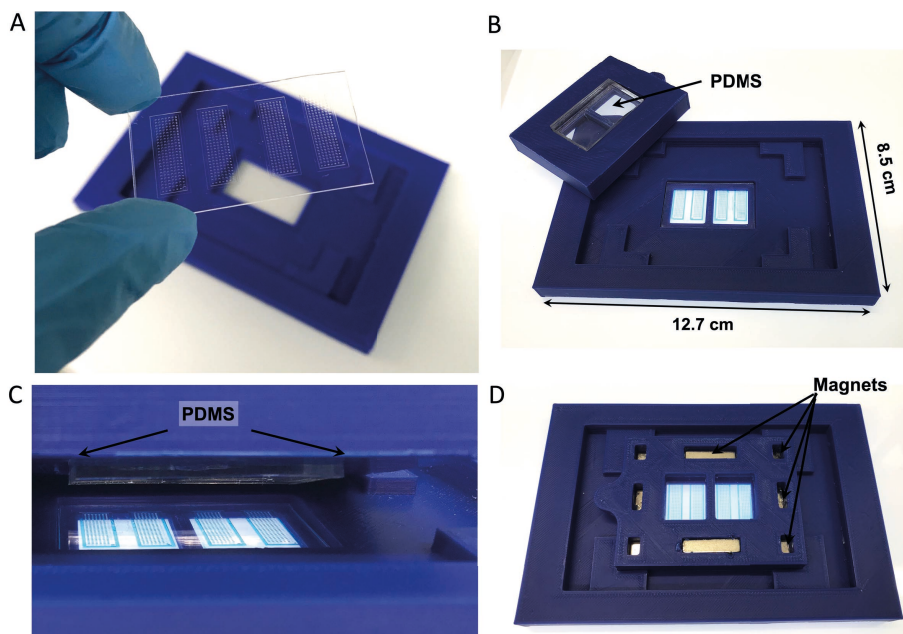

**Figure S4.** Clamping device: use and assembly.

The microfluidic array (A) is filled with agarose gel and placed over a sample-containing glass slide, positioned in the middle of the clamping device (B). The sample and the glass slide are kept in contact using the top part of the clamping device, which is pressing a PDMS slab (C) against the array using the magnetic force. The top and the bottom parts contain eight magnets in the corresponding positions, visible in picture D, showing the final assembled clamping system. (Agarose gel contains blue food colorant for visualization.)

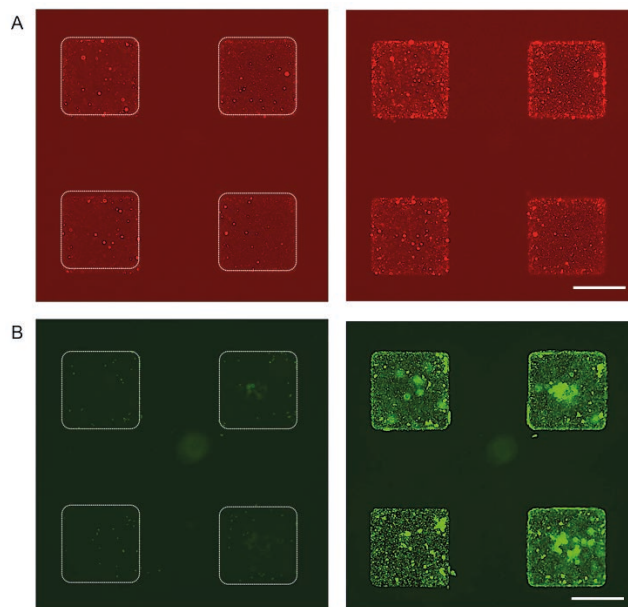

**Figure S5.** Four individual chambers of the AST microfluidic platform. (A) Detailed micrographs of the oxygen-sensing nanoprobe embedded in the 2.5 % agarose gel at the beginning and at the end of the 5 h cultivation of the sfGFP producing *E. coli* ATCC 35218 [pSEVA271\_sfgfp]. (B) Detailed micrographs of the corresponding bacterial culture, again at the beginning and after the 5 h cultivation, visualized by the cell-produced sfGFP. Scale bar: 200  $\mu$ m

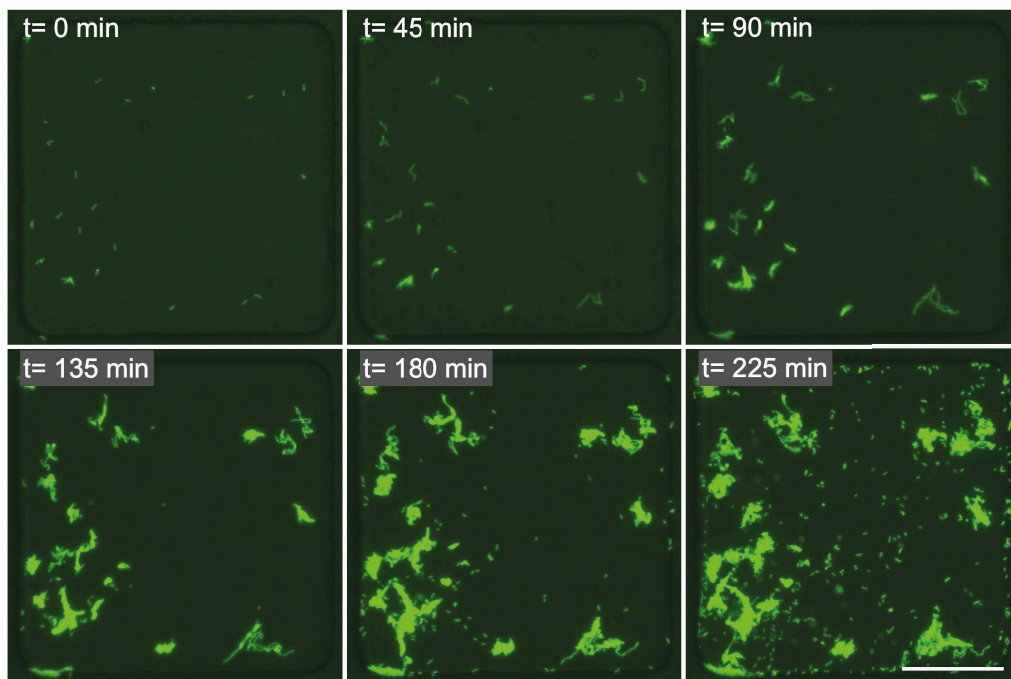

**Figure S6.** Time-lapse images from a selected chamber showing bacterial morphology (*E. coli* ATCC 25922 [pSEVA271\_sfgfp]) during the cultivation in the microfluidic chamber system, here as a control without any antibiotics. Scale bar: 100  $\mu$ m

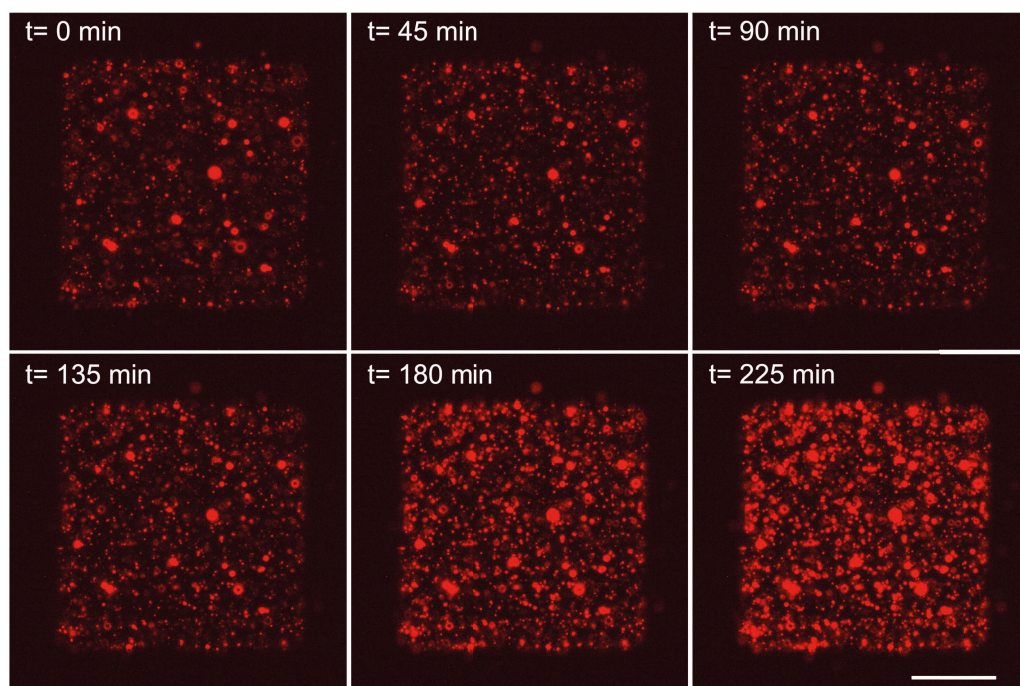

**Figure S7.** Time-lapse images from a selected chamber showing luminescence of the oxygen-sensing nanoprobe (*E. coli* ATCC 25922 [pSEVA271\_sfgfp]) during the cultivation in the microfluidic chamber system, here as a control without any antibiotics. Scale bar: 100  $\mu$ m

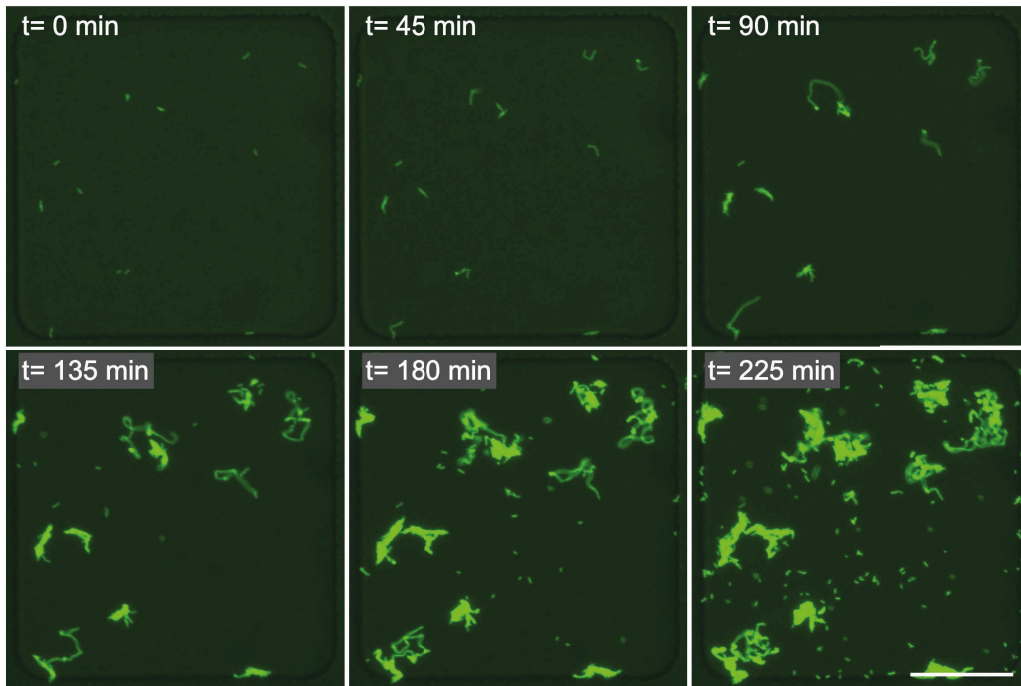

**Figure S8.** Time-lapse images from a selected chamber showing changes in bacteria morphology (*E. coli* ATCC 25922 [pSEVA271\_sfgfp]) during cultivation in the microfluidic chamber system supplied with ciprofloxacin at a concentration of 0.25 MIC<sub>ref</sub>. Measured from initial OD<sub>600</sub>: 0.02; MIC<sub>ref</sub>= 0.008 μg mL<sup>-1</sup>. Scale bar: 100 μm

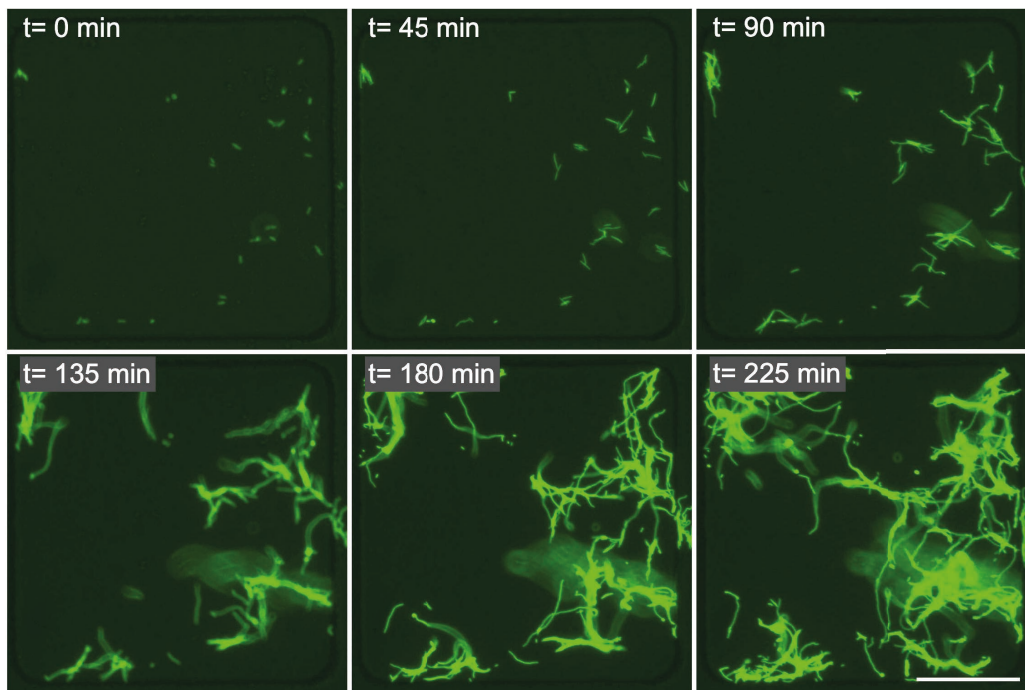

**Figure S9.** Time-lapse images from a selected chamber showing changes in bacterial morphology (*E. coli* ATCC 25922 [pSEVA271\_sfgfp]) during cultivation using the presented microfluidic chamber system supplied with ciprofloxacin at a concentration of 1 MIC<sub>ref</sub>. Measured from initial OD<sub>600</sub>: 0.02; MIC<sub>ref</sub>= 0.008 μg mL<sup>-1</sup>. Scale bar: 100 μm

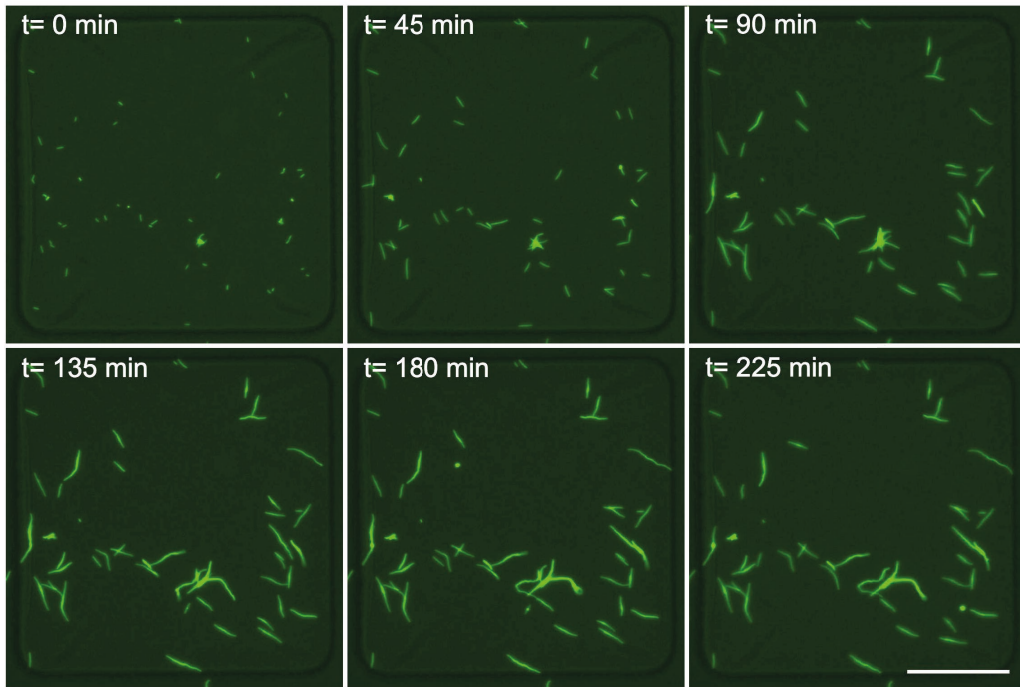

**Figure S10.** Time-lapse images from a selected chamber showing changes in bacterial morphology (*E. coli* ATCC 25922 [pSEVA271\_sfgfp]) during cultivation using the presented microfluidic chamber system supplied with ciprofloxacin at a concentration of  $4 \text{ MIC}_{\text{ref}}$ . Measured from initial  $\text{OD}_{600}$ : 0.02;  $\text{MIC}_{\text{ref}} = 0.008 \mu\text{g mL}^{-1}$ . Scale bar:  $100 \mu\text{m}$

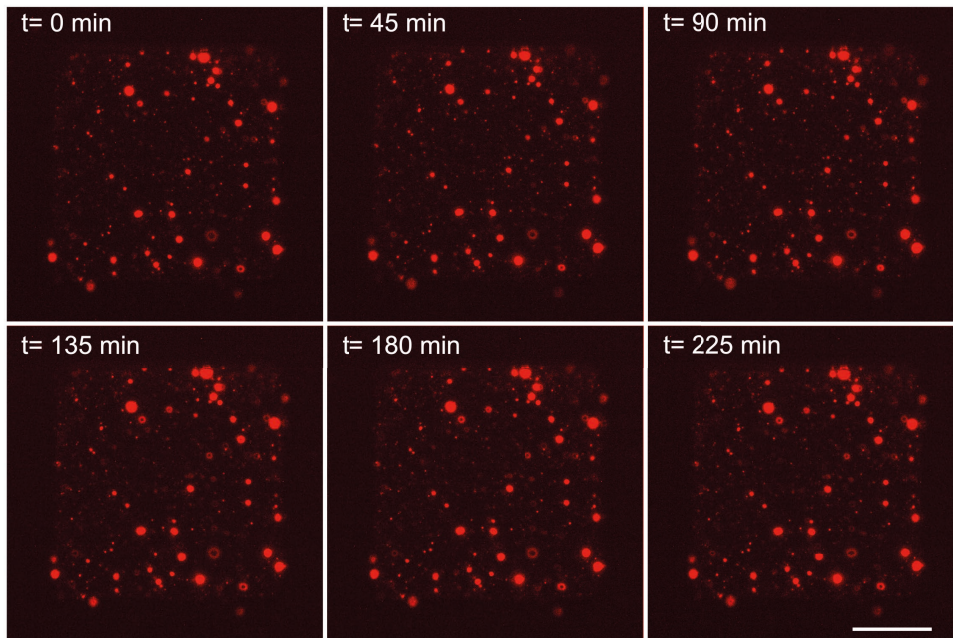

**Figure S11.** Time-lapse images from a selected chamber showing luminescence of the oxygen-sensing nanoprobess (*E. coli* ATCC 25922 [pSEVA271\_sfgfp]) during the cultivation in the microfluidic chamber system, supplied with ciprofloxacin at a concentration of  $4 \text{ MIC}_{\text{ref}}$ ,  $0.008 \mu\text{g mL}^{-1}$ . Scale bar:  $100 \mu\text{m}$

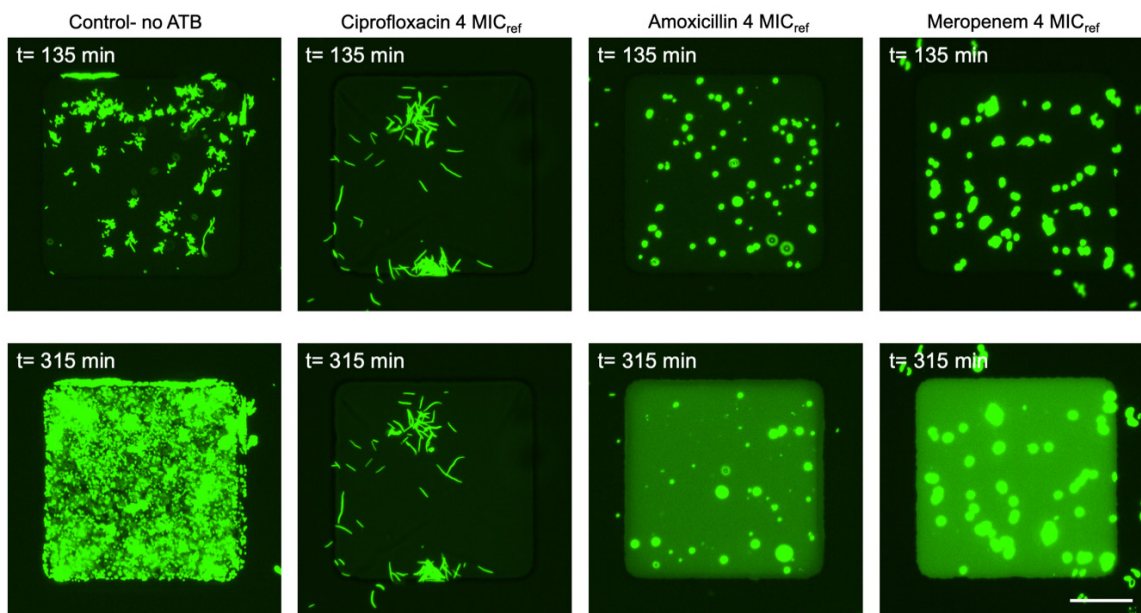

**Figure S12.** Images from selected chambers showing changes in bacterial morphology (*E. coli* ATCC 25922 [pSEVA271\_sfgfp]) at two time points during cultivation using the presented microfluidic chamber system supplied with antibiotics at a concentration of 4 MIC<sub>ref</sub>. Measured from initial OD<sub>600</sub>: 0.02; ciprofloxacin-MIC<sub>ref</sub>= 0.008 μg mL<sup>-1</sup>, amoxicillin-MIC<sub>ref</sub>= 4 μg mL<sup>-1</sup>, meropenem-MIC<sub>ref</sub>= 0.016 μg mL<sup>-1</sup>. Scale bar: 100 μm

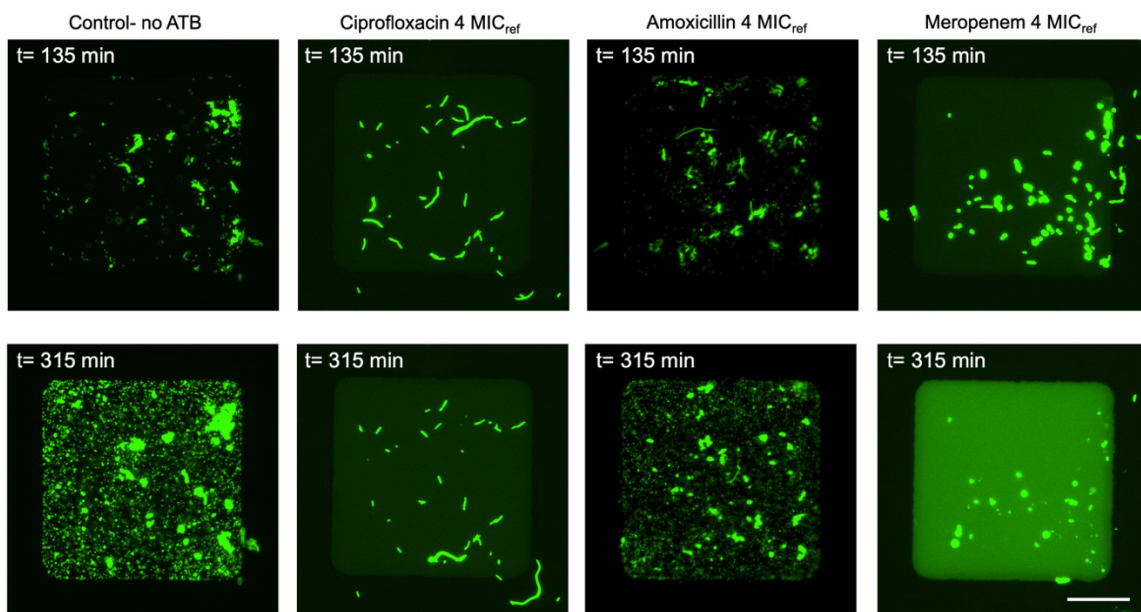

**Figure S13.** Images from selected chambers showing changes in bacterial morphology (*E. coli* ATCC 35218 [pSEVA271\_sfgfp]) at the two time points of the cultivation using the presented microfluidic chamber system supplied with antibiotics at a concentration of 4 MIC<sub>ref</sub>. Measured from initial OD<sub>600</sub>: 0.02; ciprofloxacin-MIC<sub>ref</sub>= 0.008 μg mL<sup>-1</sup>, amoxicillin-MIC<sub>ref</sub>= 4 μg mL<sup>-1</sup>, meropenem-MIC<sub>ref</sub>= 0.016 μg mL<sup>-1</sup>. Scale bar: 100 μm



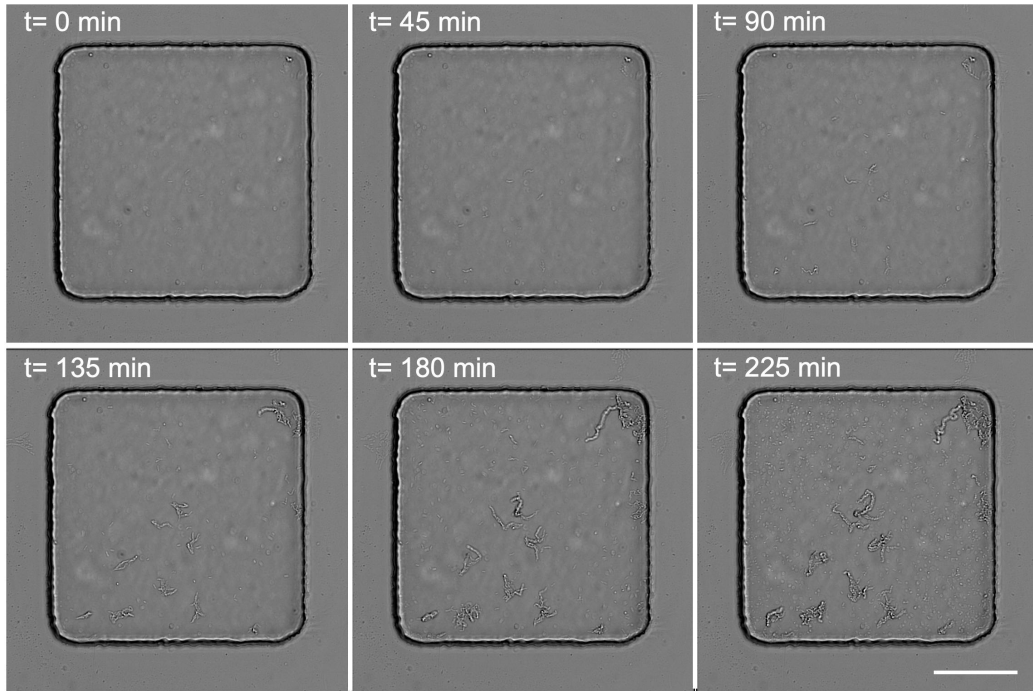

**Figure S14.** Time-lapse images from a selected chamber showing changes in bacterial morphology (*E. coli*-clinical isolate) during the cultivation without the antibiotic supply. Measured from initial  $OD_{600}$ : 0.02; Scale bar: 100  $\mu\text{m}$

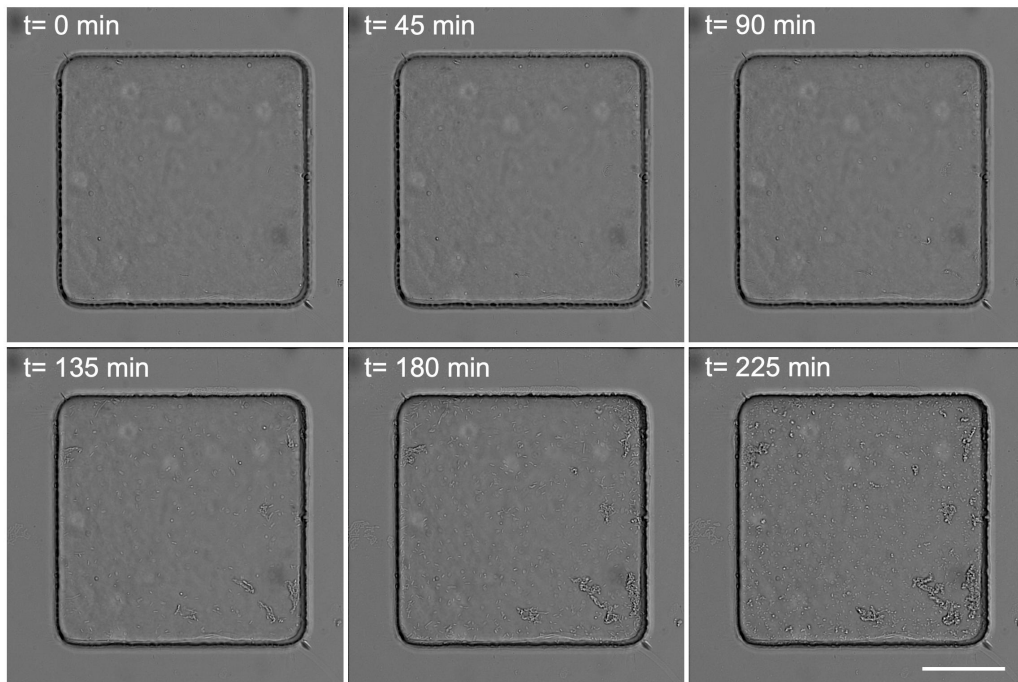

**Figure S15.** Time-lapse images from a selected chamber showing changes in bacterial morphology (*E. coli*-clinical isolate) during the cultivation in the presence of amoxicillin at the concentration  $4 \text{ MIC}_{\text{ref}}$ . ( $\text{MIC}_{\text{ref}} = 4 \mu\text{g mL}^{-1}$ ). Measured from initial  $OD_{600}$ : 0.02; Scale bar: 100  $\mu\text{m}$

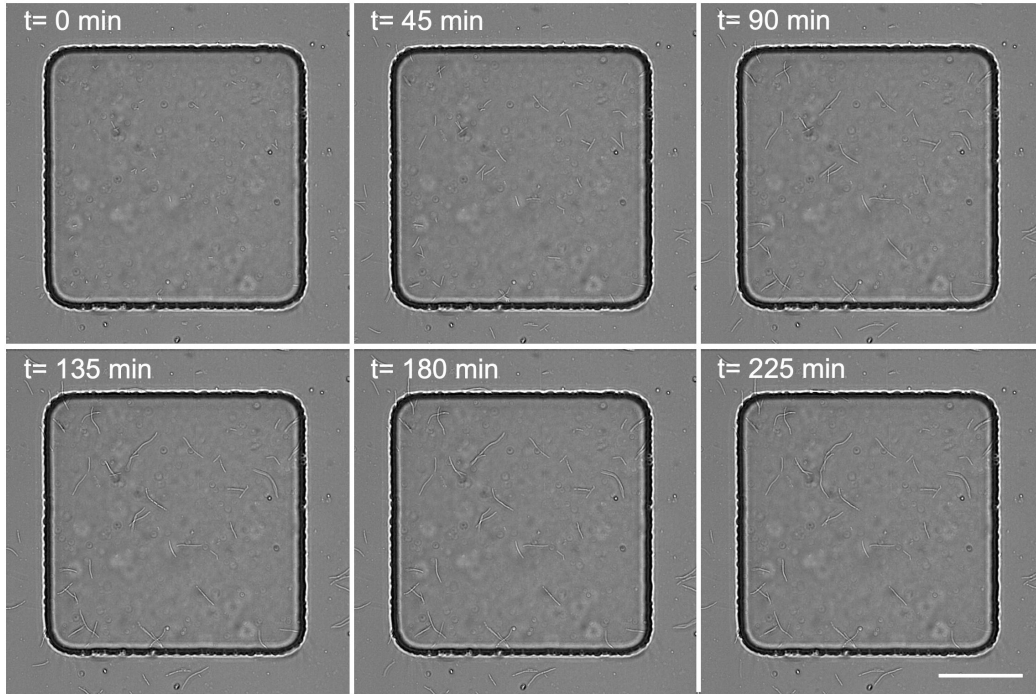

**Figure S16.** Time-lapse images from a selected chamber showing changes in bacterial morphology (*E. coli*-clinical isolate) during the cultivation in the presence of ciprofloxacin at the concentration  $4 \text{ MIC}_{\text{ref}}$ . ( $\text{MIC}_{\text{ref}} = 0.008 \mu\text{g mL}^{-1}$ ). Measured from initial  $\text{OD}_{600}$ : 0.02; Scale bar:  $100 \mu\text{m}$

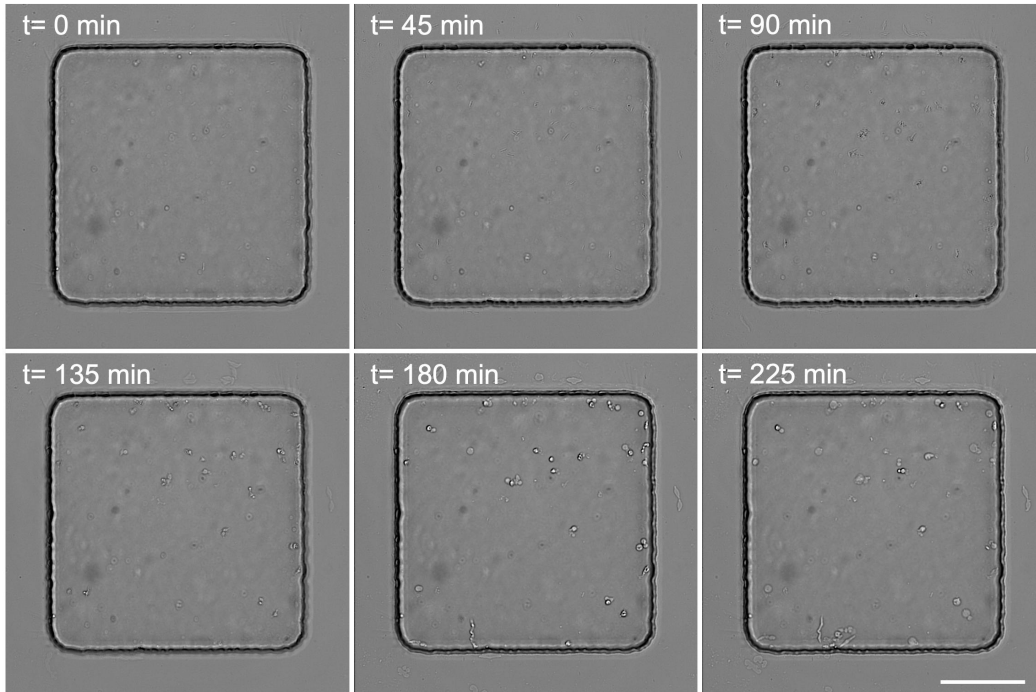

**Figure S17.** Time-lapse images from a selected chamber showing changes in bacterial morphology (*E. coli*-clinical isolate) during the cultivation in the presence of meropenem at the concentration  $4 \text{ MIC}_{\text{ref}}$ . ( $\text{MIC}_{\text{ref}} = 0.016 \mu\text{g mL}^{-1}$ ). Measured from initial  $\text{OD}_{600}$ : 0.02; Scale bar:  $100 \mu\text{m}$

## Supplemental table

Table S1. MIC values for the studied *E. coli* strains.

| Bacterial strain                     | MIC Broth dilution<br>[ $\mu\text{g mL}^{-1}$ ] |           |               | MIC Broth/Agar dilution EUCAST<br>[ $\mu\text{g mL}^{-1}$ ] |           |               |
|--------------------------------------|-------------------------------------------------|-----------|---------------|-------------------------------------------------------------|-----------|---------------|
|                                      | Amoxicillin                                     | Meropenem | Ciprofloxacin | Amoxicillin                                                 | Meropenem | Ciprofloxacin |
| ATCC 25922                           | 4.9                                             | 0.012     | 0.008         | 8.0/4.0                                                     | 0.016     | 0.008         |
| ATCC 25922 [pSEVA271_ <i>sfgfp</i> ] | 5.1                                             | 0.017     | 0.008         | /                                                           | /         | /             |
| ATCC 35218                           | Not active                                      | 0.014     | 0.012         | /                                                           | /         | /             |
| ATCC 35218 [pSEVA271_ <i>sfgfp</i> ] | Not active                                      | 0.016     | 0.016         | /                                                           | /         | /             |
| Clinical isolate                     | Not active                                      | 0.017     | 0.012         | /                                                           | /         | /             |
